# Supplementary material for: Molecular Characterization of Laboratory Mutants of Fusarium oxysporum f. sp. niveum Resistant to Prothioconazole, a Demethylation Inhibitor (DMI) Fungicide
Source: MDPI journal article supplement (doi:10.3390/jof7090704), 2021-08-28
Supplement: s1 [file s1]

## Supplemental figures and tables

**Figure S1.** Molecular models of Prothioconazole

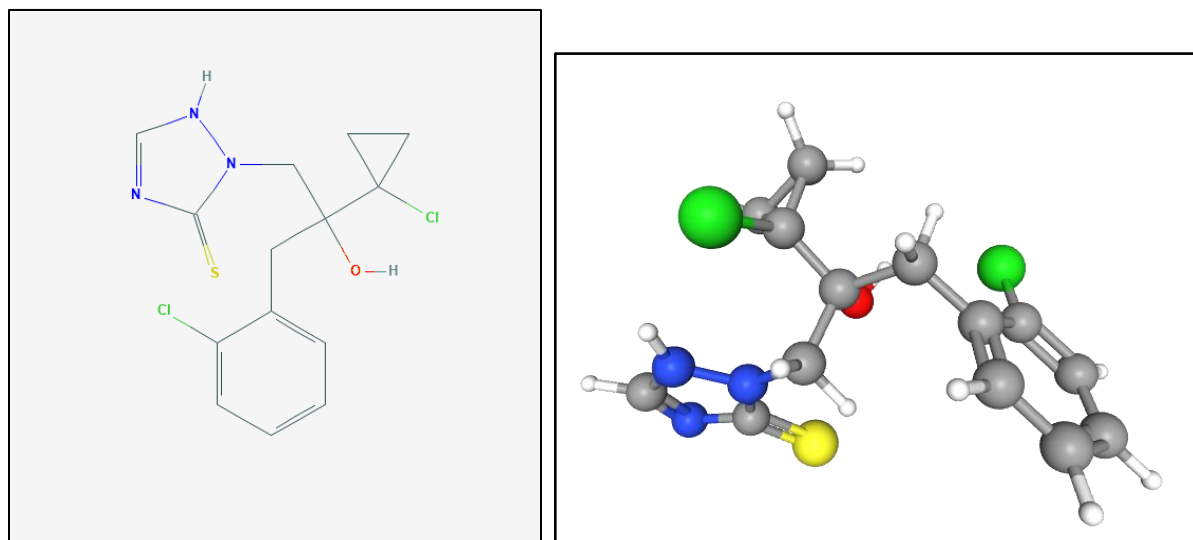

**Figure S2.** Nucleotide sequence of sensitive and resistant isolates CYP51A coding region

|              |                                                    |     |
|--------------|----------------------------------------------------|-----|
| Sensitive1   | ATGTTCTCACTCCTATACTACCCTCTATGGGCCTTTGCTTCCTGCCTAGT | 50  |
| Resistant1   | ATGTTCTCACTCCTATACTACCCTCTATGGGCCTTTGCTTCCTGCCTAGT | 50  |
| Sensitive51  | TATCATCACTCTCAACGTCTTATACCAGAAGCTCCCTCGAAATGCCAACG | 100 |
| Resistant51  | TATCATCACTCTCAACGTCTTATACCAGAAGCTCCCTCGAAATGCCAACG | 100 |
| Sensitive101 | AACCTCCGTTAGTGTTCCACTGGCTTCCATTCGTTGGGAATGCTGTTGCT | 150 |
| Resistant101 | AACCTCCGTTAGTGTTCCACTGGCTTCCATTCGTTGGGAATGCTGTTGCT | 150 |
| Sensitive151 | TATGGACTCGACCCTTATGGTTTCTTTGTGAAGTGTCGAGAAAAGCACGG | 200 |
| Resistant151 | TATGGACTCGACCCTTATGGTTTCTTTGTGAAGTGTCGAGAAAAGCACGG | 200 |
| Sensitive201 | CGATGTCTTCACCTTTATCCTCTTCGGTCGAAAAATCGTTGCCTGTCTTG | 250 |
| Resistant201 | CGATGTCTTCACCTTTATCCTCTTCGGTCGAAAAATCGTTGCCTGTCTTG | 250 |
| Sensitive251 | GTGTTGACGGCAATGACTTTGTTCTCAACAGTCGAATTCAGGACGCCAAC | 300 |
| Resistant251 | GTGTTGACGGCAATGACTTTGTTCTCAACAGTCGAATTCAGGACGCCAAC | 300 |
| Sensitive301 | GCCGAAGAAATCTACAGTCCATTGACAACGCCTGTCTTTGGTAGTGATGT | 350 |
| Resistant301 | GCCGAAGAAATCTACAGTCCATTGACAACGCCTGTCTTTGGTAGTGATGT | 350 |
| Sensitive351 | CGTATACGATTGTCCCAACTCGAAGCTCATGGAGCAAAAGAAGTTTGTCA | 400 |

|               |                                                     |      |
|---------------|-----------------------------------------------------|------|
| Resistant351  | CGTATACGATTGTCCCAACTCGAAGCTCATGGAGCAAAGAAGTTTGTCA   | 400  |
| Sensitive401  | AGTTTGGCCTTACACAAAAGGCTCTCGAGTCCCATGTCCAGTTGATCGAG  | 450  |
|               |                                                     |      |
| Resistant401  | AGTTTGGCCTTACACAAAAGGCTCTCGAGTCCCATGTCCAGTTGATCGAG  | 450  |
| Sensitive451  | CGAGAGGTTCTGGAGTACATCCAAGCTGTACCTTCATTCTCTGGAAAGTC  | 500  |
|               |                                                     |      |
| Resistant451  | CGAGAGGTTCTGGAGTACATCCAAGCTGTACCTTCATTCTCTGGAAAGTC  | 500  |
| Sensitive501  | TGGCACAGTTGATGTATCCAAGGCAATGGCTGAGATAACCATCTTCACTG  | 550  |
|               |                                                     |      |
| Resistant501  | TGGCACAGTTGATGTATCCAAGGCAATGGCTGAGATAACCATCTTCACTG  | 550  |
| Sensitive551  | CTGCTCGCTCTCTGCAGGGCGAAGAAGTTCGACGGAAGCTTACAGCTGAG  | 600  |
|               |                                                     |      |
| Resistant551  | CTGCTCGCTCTCTGCAGGGCGAAGAAGTTCGACGGAAGCTTACAGCTGAG  | 600  |
| Sensitive601  | TTTGCAGCTCTGTATCATGACCTTGACCTAGGCTTCACTCCTGTAAACTT  | 650  |
|               |                                                     |      |
| Resistant601  | TTTGCAGCTCTGTATCATGACCTTGACCTAGGCTTCACTCCTGTAAACTT  | 650  |
| Sensitive651  | CCTGTTCCCTTGGCTACCTTTGCCTCATAACCGACGTCGAGATGCTGCTC  | 700  |
|               |                                                     |      |
| Resistant651  | CCTGTTCCCTTGGCTACCTTTGCCTCATAACCGACGTCGAGATGCTGCTC  | 700  |
| Sensitive701  | ATGCAAAGATGAGAGAGATCTACATGGACATCATTAAACGAACGAAGAAGA | 750  |
|               |                                                     |      |
| Resistant701  | ATGCAAAGATGAGAGAGATCTACATGGACATCATTAAACGAACGAAGAAGA | 750  |
| Sensitive751  | GGCGTAGGGGACTTGGAGAAAGGAACTGACATGATCGCCAACCTGATGAA  | 800  |
|               |                                                     |      |
| Resistant751  | GGCGTAGGGGACTTGGAGAAAGGAACTGACATGATCGCCAACCTGATGAA  | 800  |
| Sensitive801  | TTGCGAGTACAAAAACGGGCAGCCGATTCCGGACAAAGAGATCGCGTACA  | 850  |
|               |                                                     |      |
| Resistant801  | TTGCGAGTACAAAAACGGGCAGCCGATTCCGGACAAAGAGATCGCGTACA  | 850  |
| Sensitive851  | TGATGATCACTCTTCTCATGGCTGGACAACACTCTTCGTCATCTGCTAGT  | 900  |
|               |                                                     |      |
| Resistant851  | TGATGATCACTCTTCTCATGGCTGGACAACACTCTTCGTCATCTGCTAGT  | 900  |
| Sensitive901  | TCATGGATCATACTACATCTGGCTTCATCCACTGACATTGCTGAGGAACT  | 950  |
|               |                                                     |      |
| Resistant901  | TCATGGATCATACTACATCTGGCTTCATCCACTGACATTGCTGAGGAACT  | 950  |
| Sensitive951  | CTACCAAGAGCAACTCATTAACCTTGAGTGCCGATGGTGTTCTCCCTCCCC | 1000 |
|               |                                                     |      |
| Resistant951  | CTACCAAGAGCAACTCATTAACCTTGAGTGCCGATGGTGTTCTCCCTCCCC | 1000 |
| Sensitive1001 | TTCAGTACTCCGATCTCGACAAGCTTCCCCTTCTTCAGAATGTCGTCAA   | 1050 |
|               |                                                     |      |
| Resistant1001 | TTCAGTACTCCGATCTCGACAAGCTTCCCCTTCTTCAGAATGTCGTCAA   | 1050 |
| Sensitive1051 | GAAACACTCCGTGTTTATTCTTCCATTCACTCCATTCTGCGAAAGGTTAA  | 1100 |
|               |                                                     |      |
| Resistant1051 | GAAACACTCCGTGTTTATTCTTCCATTCACTCCATTCTGCGAAAGGTTAA  | 1100 |

|               |                                                     |      |
|---------------|-----------------------------------------------------|------|
| Sensitive1101 | AAGACCTATGCAAGCAACTGGATCACCTTACACCATCACCACAGACAAGG  | 1150 |
|               |                                                     |      |
| Resistant1101 | GAGACCTATGCAAGCAACTGGATCACCTTACACCATCACCACAGACAAGG  | 1150 |
| Sensitive1151 | TTCTCCTCGCTTCACCAACTGTTACAGCGTTGAGTGAAGAACTTCACA    | 1200 |
|               |                                                     |      |
| Resistant1151 | TTCTCCTCGCTTCACCAACTGTTACAGCGTTGAGTGAAGAACTTCACA    | 1200 |
| Sensitive1201 | GACGCCCAAAGATGGAATCCTCATCGGTGGGATAACAAACCCAGGAGGA   | 1250 |
|               |                                                     |      |
| Resistant1201 | GACGCCCAAAGATGGAATCCTCATCGGTGGGATAACAAACCCAGGAGGA   | 1250 |
| Sensitive1251 | GGCCGTGACGGACGATGTCATTGACTACGGCTACGGCGCTGTTTCTAAAG  | 1300 |
|               |                                                     |      |
| Resistant1251 | GGCCGTGACGGACGATGTCATTGACTACGGCTACGGCGCTGTTTCTAAAG  | 1300 |
| Sensitive1301 | GAACGAAGAGCCCATACTTACCCTTTGGCGCTGGTCGGCATCGCTGCATC  | 1350 |
|               |                                                     |      |
| Resistant1301 | GAACGAAGAGCCCATACTTACCCTTTGGCGCTGGTCGGCATCGCTGCATC  | 1350 |
| Sensitive1351 | GGGGAGAAGTTTGCTTATGTCAACTTGGGCGTTATCGTCGCGACTTTGGT  | 1400 |
|               |                                                     |      |
| Resistant1351 | GGGGAGAAGTTTGCTTATGTCAACTTGGGCGTTATCGTCGCGACTTTGGT  | 1400 |
| Sensitive1401 | GCGCAACTTCAGACTGTGCGACTCTTGATGGCAAGCCTGGTGTTCCGGCAA | 1450 |
|               |                                                     |      |
| Resistant1401 | GCGCAACTTCAGACTGTGCGACTCTTGATGGCAAGCCTGGTGTTCCGGCAA | 1450 |
| Sensitive1451 | CTGACTACACTTCTCTCTTCTCAAGGCCAGCCCAACCTGCATACATAAAC  | 1500 |
|               |                                                     |      |
| Resistant1451 | CTGACTACACTTCTCTCTTCTCAAGGCCAGCCCAACCTGCATACATAAAC  | 1500 |
| Sensitive1501 | TGGGAGCGCAGGAGGGCTTAA                               | 1521 |
|               |                                                     |      |
| Resistant1501 | TGGGAGCGCAGGAGGGCTTAA                               | 1521 |

**Figure S3.** Amino Acid sequence of sensitive and resistant isolates

|              |                                                    |     |
|--------------|----------------------------------------------------|-----|
| Sensitive1   | MFSLLYYPLWAFASCLVIIITLNVLYQKLPRNANEPLVFWHLFPVGNVA  | 50  |
|              |                                                    |     |
| Resistant1   | MFSLLYYPLWAFASCLVIIITLNVLYQKLPRNANEPLVFWHLFPVGNVA  | 50  |
| Sensitive51  | YGLDPYGFFVKCREKHGDVFTFILFGRKIVACLVDGNDFVLNSRIQDAN  | 100 |
|              |                                                    |     |
| Resistant51  | YGLDPYGFFVKCREKHGDVFTFILFGRKIVACLVDGNDFVLNSRIQDAN  | 100 |
| Sensitive101 | AEEIYSPLTTPVFGSDVVYDCPNSKLMEQKKFVKFGLTQKALESHVQLIE | 150 |
|              |                                                    |     |
| Resistant101 | AEEIYSPLTTPVFGSDVVYDCPNSKLMEQKKFVKFGLTQKALESHVQLIE | 150 |
| Sensitive151 | REVLEYIQAVPSFSGKSGTVDVSKAMAEITIFTAARSLQGEEVRRKLTAE | 200 |
|              |                                                    |     |
| Resistant151 | REVLEYIQAVPSFSGKSGTVDVSKAMAEITIFTAARSLQGEEVRRKLTAE | 200 |

Sensitive201 FAALYHDLDLGFTPVNFLFPWLPLPHNRRRDAAHAKMREIYMDIINERRR 250  
 |||||  
 Resistant201 FAALYHDLDLGFTPVNFLFPWLPLPHNRRRDAAHAKMREIYMDIINERRR 250

Sensitive251 GVGDLKGTDMIANLMNCEYKNGQPIPDKEIAHMMITLLMAGQHSSSSAS 300  
 |||||  
 Resistant251 GVGDLKGTDMIANLMNCEYKNGQPIPDKEIAHMMITLLMAGQHSSSSAS 300

Sensitive301 SWIILHLASSTDIAEELYQEQLINLSADGVLPPPLQYSDLDKPLQLNVVK 350  
 |||||  
 Resistant301 SWIILHLASSTDIAEELYQEQLINLSADGVLPPPLQYSDLDKPLQLNVVK 350

Sensitive351 ETLRVHSSIHSILRKVKRPMQATGSPYTITTDKVLLASPTVTALSEEHFT 400  
 |||||  
 Resistant351 ETLRVHSSIHSILRKVKRPMQATGSPYTITTDKVLLASPTVTALSEEHFT 400

Sensitive401 DAQRWNPHRWDNKPQEEAVTDDVIDYGYGAVSKGTKSPYLPFGAGRHRCI 450  
 |||||  
 Resistant401 DAQRWNPHRWDNKPQEEAVTDDVIDYGYGAVSKGTKSPYLPFGAGRHRCI 450

Sensitive451 GEKFAYVNLGVIVATLVRNFRLLSTLDGKPGVPATDYTSLFSRPAQPAYIN 500  
 |||||  
 Resistant451 GEKFAYVNLGVIVATLVRNFRLLSTLDGKPGVPATDYTSLFSRPAQPAYIN 500

Sensitive501 WERRRA 506  
 |||||  
 Resistant501 WERRRA 506

**Table S1.** List of primers used in this study.

| Primer name | Sequence               | Assay | Conditions                                                                                              | expected size (bp) | Source     |
|-------------|------------------------|-------|---------------------------------------------------------------------------------------------------------|--------------------|------------|
| FCYPA1upF   | GCTTACGATCGGAGAAGAACA  | PCR   | 95 °C for 3 mins, 35 cycles of 95 °C for 30s, 58 °C for 30s, and 72 °C for 1 min, then 72 °C for 6 mins | 336                | This study |
| FCYPA1upR   | AGGCCCATAGAGGGTAGTATAG |       |                                                                                                         |                    |            |
| FCYPA2upF   | CCTTTGCTCCTGCCTAGTT    | PCR   | 95 °C for 3 mins, 35 cycles of 95 °C for 30s, 58 °C for 30s, and 72 °C for 1 min, then 72 °C for 6 mins | 347                | This study |
| FCYPA2upR   | GAGCTTCGAGTTGGGACAAT   |       |                                                                                                         |                    |            |
| FCYPB1upF   | GTGTTTGACCGTTGTGTTGAG  | PCR   | 95 °C for 3 mins, 35 cycles of 95 °C for 30s, 57 °C for 30s, and 72 °C for 1 min, then 72 °C for 6 mins | 364                | This study |
| FCYPB1upR   | CATGGACGGTTCCTGGAAATA  |       |                                                                                                         |                    |            |
| FCYPB2upF   | TATTTCCAGGAACCGTCCATG  | PCR   | 95 °C for 3 mins, 35 cycles of 95 °C for 30s, 60 °C for 30s, and 72 °C for 1 min, then 72 °C for 6 mins | 393                | This study |
| FCYPB2upR   | CGTTCCGTTTCGAAGGATGA   |       |                                                                                                         |                    |            |
| FCYPC1upF   | CCAGTACATAATAGCAGGAGTG | PCR   | 95 °C for 3 mins, 35 cycles of 95 °C for 30s, 58 °C for 30s, and 72 °C for 1 min, then 72 °C for 6 mins | 349                | This study |
| FCYPC1upR   | AAATTGGTCGCTCTGACTCAC  |       |                                                                                                         |                    |            |
| FCYPC2upF   | GTGAGTCAGAGCGACCAATTT  | PCR   | 95 °C for 3 mins, 35 cycles of 95 °C for 30s, 59 °C for 30s, and 72 °C for 1 min, then 72 °C for 6 mins | 408                | This study |
| FCYPC2upR   | GGTGTCTGGGATGAGGATTTG  |       |                                                                                                         |                    |            |
| FCypA1F     | TGAGGACGCGAATCCTTCTG   | PCR   | 95 °C for 3 mins, 35 cycles of 95 °C for 30s, 59 °C for 30s, and 72 °C for 1 min, then 72 °C for 6 mins | 692                | This study |
| FCypA1R     | TGCTCCATGAGCTTCGAGTT   |       |                                                                                                         |                    |            |

|                 |                        |      |                                                                                                         |     |                                  |
|-----------------|------------------------|------|---------------------------------------------------------------------------------------------------------|-----|----------------------------------|
| FCypA2F         | TCCCAACTCGAAGCTCATGG   | PCR  | 95 °C for 3 mins, 35 cycles of 95 °C for 30s, 58 °C for 30s, and 72 °C for 1 min, then 72 °C for 6 mins | 759 | This study                       |
| FCypA2R         | CCAGGTGCTTGCATAGGTCT   |      |                                                                                                         |     |                                  |
| FCypA3F         | CCTATGCAAGCACCTGGATCA  | PCR  | 95 °C for 3 mins, 35 cycles of 95 °C for 30s, 58 °C for 30s, and 72 °C for 1 min, then 72 °C for 6 mins | 678 | This study                       |
| FCypA3R         | GTGGAATTGTGCAAATAGGGCA |      |                                                                                                         |     |                                  |
| FCypA4F         | TCCACCTCTACTGTTGCGAA   | PCR  | 95 °C for 3 mins, 35 cycles of 95 °C for 30s, 58 °C for 30s, and 72 °C for 1 min, then 72 °C for 6 mins | 680 | This study                       |
| FCypA4R         | CGACCCCGCTTATACCAAGG   |      |                                                                                                         |     |                                  |
| FCypA5F         | CCTTGGTATAAGCGGGGTCTG  | PCR  | 95 °C for 3 mins, 35 cycles of 95 °C for 30s, 58 °C for 30s, and 72 °C for 1 min, then 72 °C for 6 mins | 712 | This study                       |
| FCypA5R         | ACCTACCCGCTTCTTGTTT    |      |                                                                                                         |     |                                  |
| FOCYP51Bpyes2-F | GGGTCTCCTCCAAGAACTT    | PCR  | 95 °C for 3 mins, 35 cycles of 95 °C for 30s, 58 °C for 30s, and 72 °C for 1 min, then 72 °C for 6 mins | 692 | Zheng et al. (2018) & This study |
| FCypB1R         | CGAACCTCGGCGGAGATAAT   |      |                                                                                                         |     |                                  |
| FCypB2F         | CGTGCCTATTATCTCCGCCG   | PCR  | 95 °C for 3 mins, 35 cycles of 95 °C for 30s, 58 °C for 30s, and 72 °C for 1 min, then 72 °C for 6 mins | 672 | This study                       |
| FCypB2R         | ACAGGCATGGGAGACTTGAC   |      |                                                                                                         |     |                                  |
| FCypB3F         | GTCAAGTCTCCCATGCCTGT   | PCR  | 95 °C for 3 mins, 35 cycles of 95 °C for 30s, 58 °C for 30s, and 72 °C for 1 min, then 72 °C for 6 mins | 444 | This study & Zheng et al. (2018) |
| FoCYP51Bpyes2-R | CTACTGCTGGCGTCTCTC     |      |                                                                                                         |     |                                  |
| FCypC1F         | AGCACATTCGCAACCCTGTA   | PCR  | 95 °C for 3 mins, 35 cycles of 95 °C for 30s, 58 °C for 30s, and 72 °C for 1 min, then 72 °C for 6 mins | 675 | This study                       |
| FCypC1R         | TTCATCACGCCGAAGCCATA   |      |                                                                                                         |     |                                  |
| FCypC2F         | TTATGGCTTCGGCGTGATGA   | PCR  | 95 °C for 3 mins, 35 cycles of 95 °C for 30s, 58 °C for 30s, and 72 °C for 1 min, then 72 °C for 6 mins | 691 | This study                       |
| FCypC2R         | CCGGCAGTCCAGGTATCTTTT  |      |                                                                                                         |     |                                  |
| FCypC3F         | AAGATACCTGGACTGCCGGA   | PCR  | 95 °C for 3 mins, 35 cycles of 95 °C for 30s, 58 °C for 30s, and 72 °C for 1 min, then 72 °C for 6 mins | 505 | This study                       |
| FCypC3R         | CACTGTTGGGACGCATCTA    |      |                                                                                                         |     |                                  |
| FCAq1F          | TGGCTACCTTTGCCTCATAAC  | qPCR | 95 °C for 3 mins, 35 cycles of 95 °C for 30s, 58 °C for 30s, and 72 °C for 1 min, then 72 °C for 6 mins | 120 | This study                       |
| FCAq1R          | GTCAGTTCTTTCTCCAAGTCC  |      |                                                                                                         |     |                                  |
| Fn-1            | TACCACTTGTTGCCTCGGC    | qPCR | 95°C for 2 mins, 40 cycles of 95°C for 10s and 60°C for 40s and a temperature ramp of 0.2°C/s           | 327 | Zhang et al. (2006)              |
| Fn-2            | TTGAGGAACGCGAATTAAC    |      |                                                                                                         |     |                                  |

**Table S2.** Resistant phenotype and the relative expression of the FON mutants

| Resistant Group            | EC <sub>50</sub> | Resistance Factor | Relative Expression |
|----------------------------|------------------|-------------------|---------------------|
| Highly Resistant 1         | 47.679           | 9.562767          | 23.10286712836      |
| Highly Resistant 2         | 172.228          | 34.5430113        | 38.0546276800871    |
| Highly Resistant 3         | 184.78           | 37.0605106        | 46.6886510156855    |
| HR mean                    | 108.33           | 21.7272709        | 35.94871527         |
| Intermediately Resistant 1 | 26.365           | 5.28791191        | 12.5099142900575    |
| Intermediately Resistant 2 | 36.45            | 7.31061594        | 27.8576180254759    |

|                            |        |            |                  |
|----------------------------|--------|------------|------------------|
| Intermediately Resistant 3 | 33.321 | 6.68304619 | 14.1232479406504 |
| IR mean                    | 31.77  | 6.37196895 | 18.16359342      |
| Sensitive 1                | 4.217  | 0.84578511 | 8.75434961008591 |
| Sensitive 2                | 6.969  | 1.39774163 | 11.79415374      |
| Sensitive 3                | 4.079  | 0.81810706 | 4.642816         |
| S mean                     | 4.9859 | 1          | 8.39710634       |

**Supplementary Table S3.** Raw results from the greenhouse bioassay

| Treatment  | Plant 1  | Plant 2  | Plant 3  | Plant 4  | Plant 5  | Plant 6 | Plant 7 | Plant 8 | Plant 9 | Plant 10 | Plant 11 | Plant 12 | Plant 13 |
|------------|----------|----------|----------|----------|----------|---------|---------|---------|---------|----------|----------|----------|----------|
| 0 (NC)     | 0        | 0        | 3        | 3        | 0        | 3       | 0       | 0       | 3       | 3        | 3        | 7        | 9        |
| 1 (S)      | 9        | 5        | 5        | 3        | 3        | 3       | 3       | 0       | 5       | 3        | 7        | 5        | 3        |
| 2 (HR)     | 5        | 3        | 5        | 5        | 9        | 0       | 3       | 5       | 9       | 3        | 9        | 5        | 5        |
| 3 (IR)     | 3        | 3        | 5        | 3        | 3        | 5       | 0       | 3       | 3       | 5        | 9        | 9        | 7        |
| 4 (S-Pro)  | 7        | 0        | 0        | 3        | 0        | 3       | 0       | 3       | 3       | 0        | 3        | 9        | 5        |
| 5 (HR-Pro) | 7        | 3        | 3        | 3        | 3        | 3       | 0       | 0       | 5       | 3        | 3        | 3        | 9        |
| 6 (IR-Pro) | 9        | 3        | 3        | 3        | 0        | 0       | 0       | 3       | 0       | 0        | 7        | 7        | 7        |
| 0 (NC)     | 0        | 0        | 3        | 3        | 0        | 3       | 0       | 0       | 3       | 3        | 3        | 7        | 9        |
|            |          |          |          |          |          |         |         |         |         |          |          |          |          |
| Treatment  | Plant 14 | Plant 15 | Plant 16 | Plant 17 | Plant 18 |         |         |         |         |          |          |          |          |
| 0 (NC)     | 9        | 0        | 0        | 0        | 3        |         |         |         |         |          |          |          |          |
| 1 (S)      | 3        | 0        | 5        | 0        | 3        |         |         |         |         |          |          |          |          |
| 2 (HR)     | 7        | 3        | 3        | 3        | 5        |         |         |         |         |          |          |          |          |
| 3 (IR)     | 9        | 0        | 0        | 5        | 5        |         |         |         |         |          |          |          |          |
| 4 (S-Pro)  | 3        | 3        | 0        | 3        | 3        |         |         |         |         |          |          |          |          |
| 5 (HR-Pro) | 3        | 5        | 3        | 3        | 5        |         |         |         |         |          |          |          |          |
| 6 (IR-Pro) | 3        | 3        | 3        | 0        | 3        |         |         |         |         |          |          |          |          |
| 0 (NC)     | 9        | 0        | 0        | 0        | 3        |         |         |         |         |          |          |          |          |
